# Supplementary material for: Clinical relevance of circulating mucosal-associated invariant T cell levels and their anti-cancer activity in patients with mucosal-associated cancer
Source: PubMed Central journal article supplement (PMC5342813; doi:10.18632/oncotarget.11187), 2016-08-10
Supplement: oncotarget-07-76274-s001.pdf [file oncotarget-07-76274-s001.pdf]

## Clinical relevance of circulating mucosal-associated invariant T cell levels and their anti-cancer activity in patients with mucosal-associated cancer

### Supplementary Material

**Supplementary Table 1.** Spearman's correlation coefficients for the percentage of tumor-infiltrating MAIT cells with respect to clinical and laboratory findings in 17 colon cancer patients.

| Variable                                | Correlation coefficient ( $\gamma_s$ ) | <i>P</i> value |
|-----------------------------------------|----------------------------------------|----------------|
| Age                                     | -0.242                                 | 0.385          |
| T staging                               | -0.149                                 | 0.596          |
| N staging                               | -0.405                                 | 0.135          |
| Tumor size                              | -0.589                                 | 0.021          |
| Leukocyte count (cells/ $\mu$ L)        | -0.082                                 | 0.771          |
| Lymphocyte count (cells/ $\mu$ L)       | 0.234                                  | 0.401          |
| Monocyte count (cells/ $\mu$ L)         | -0.538                                 | 0.038          |
| Neutrophil count (cells/ $\mu$ L)       | -0.043                                 | 0.879          |
| Hemoglobin (g/dL)                       | 0.429                                  | 0.111          |
| Platelet count ( $10^3$ cells/ $\mu$ L) | 0.080                                  | 0.776          |
| AST (U/L)                               | 0.075                                  | 0.790          |
| ALT (U/L)                               | 0.098                                  | 0.728          |
| BUN (mg/dL)                             | -0.434                                 | 0.106          |
| Creatinine (mg/dL)                      | -0.391                                 | 0.150          |
| Total protein (g/dL)                    | 0.364                                  | 0.182          |
| Albumin (g/dL)                          | 0.547                                  | 0.035          |
| CRP (mg/dL)                             | -0.482                                 | 0.069          |
| CEA (ng/mL)                             | -0.174                                 | 0.553          |

Abbreviations: AST, Aspartate transaminase; ALT, Alanine transaminase; BUN, Blood urea nitrogen; CRP, C-reactive protein; CEA, Carcinoembryonic antigen; MAC, Mucosal-associated cancer.
